# Supplementary material
Source: publisher figshare collection journal article supplement (https://acs.figshare.com/ndownloader/files/3920251)
Supplement: Supplementary file 1 [file 3920251]

Supporting Information for:

**Covalently-Anchored Carboxyphenyl Monolayer via Aryldiazonium Ion Grafting: a Well-Defined Reactive Tether Layer for On-Surface Chemistry**

Lita Lee,<sup>¶,‡</sup> Haifeng Ma,<sup>¶,†</sup> Paula A. Brooksby,<sup>¶,‡</sup>, Simon A. Brown,<sup>¶,†</sup> Yann R. Leroux,<sup>¥</sup>  
Philippe Hapiot,<sup>¥</sup> Alison J. Downard<sup>\*,¶,‡</sup>

<sup>¶</sup>MacDiarmid Institute for Advanced Materials and Nanotechnology

<sup>‡</sup>Department of Chemistry, University of Canterbury, Private Bag 4800, Christchurch, New Zealand 8140

<sup>†</sup>Department of Physics and Astronomy, University of Canterbury, Private Bag 4800, Christchurch, New Zealand 8140

<sup>¥</sup>Université de Rennes 1, Institut des Sciences Chimiques de Rennes (Equipe MaCSE), CNRS, UMR 6226, Campus de Beaulieu, Bat 10C, 35042 Rennes Cedex, France

\*To whom correspondence should be addressed. Tel: +64 3 364 2501; fax: +64 3 364 2110;

E-mail address: [alison.downard@canterbury.ac.nz](mailto:alison.downard@canterbury.ac.nz)

**Table S1. Optimized geometry of Ar-COO-Fm (Figure 7)**

Optimized Geometry at the B3LYP/6-31G\*level

x,y,z coordinates (Standard orientation)

| -----  |        |        |                         |           |           |
|--------|--------|--------|-------------------------|-----------|-----------|
| Center | Atomic | Atomic | Coordinates (Angstroms) |           |           |
| Number | Number | Type   | X                       | Y         | Z         |
| -----  |        |        |                         |           |           |
| 1      | 6      | 0      | 6.054323                | 0.459277  | 0.582644  |
| 2      | 6      | 0      | 5.936721                | -0.393367 | -0.518273 |
| 3      | 6      | 0      | 4.688152                | -0.889421 | -0.884081 |
| 4      | 6      | 0      | 3.547325                | -0.532208 | -0.152272 |
| 5      | 6      | 0      | 3.668342                | 0.321649  | 0.953013  |
| 6      | 6      | 0      | 4.920467                | 0.814046  | 1.317476  |
| 7      | 1      | 0      | 7.029018                | 0.845699  | 0.868721  |
| 8      | 1      | 0      | 6.818288                | -0.670730 | -1.089532 |
| 9      | 1      | 0      | 4.572646                | -1.554394 | -1.733632 |
| 10     | 1      | 0      | 2.786052                | 0.587743  | 1.524432  |
| 11     | 1      | 0      | 5.012166                | 1.473897  | 2.175804  |
| 12     | 6      | 0      | 2.238914                | -1.095916 | -0.591260 |
| 13     | 8      | 0      | 2.103909                | -1.896823 | -1.495193 |
| 14     | 8      | 0      | 1.197244                | -0.617677 | 0.132019  |
| 15     | 6      | 0      | -0.102897               | -1.132832 | -0.226987 |
| 16     | 1      | 0      | -0.116482               | -2.210354 | -0.034327 |
| 17     | 1      | 0      | -0.274536               | -0.977581 | -1.295521 |
| 18     | 6      | 0      | -1.147164               | -0.404758 | 0.623530  |
| 19     | 6      | 0      | -2.534665               | -1.008062 | 0.454661  |
| 20     | 1      | 0      | -0.823813               | -0.476187 | 1.672625  |

|    |   |   |           |           |           |
|----|---|---|-----------|-----------|-----------|
| 21 | 6 | 0 | -1.377607 | 1.049105  | 0.233319  |
| 22 | 6 | 0 | -2.955586 | -2.315748 | 0.668969  |
| 23 | 6 | 0 | -3.446482 | -0.024051 | 0.022053  |
| 24 | 6 | 0 | -0.473728 | 2.105343  | 0.185301  |
| 25 | 6 | 0 | -2.729961 | 1.251084  | -0.113735 |
| 26 | 6 | 0 | -4.298652 | -2.641896 | 0.446646  |
| 27 | 1 | 0 | -2.259073 | -3.079450 | 1.007472  |
| 28 | 6 | 0 | -4.786252 | -0.350590 | -0.196726 |
| 29 | 6 | 0 | -0.927767 | 3.368771  | -0.211077 |
| 30 | 1 | 0 | 0.569554  | 1.952448  | 0.442994  |
| 31 | 6 | 0 | -3.180751 | 2.512872  | -0.505869 |
| 32 | 6 | 0 | -5.204106 | -1.666026 | 0.017361  |
| 33 | 1 | 0 | -4.640010 | -3.660405 | 0.610065  |
| 34 | 1 | 0 | -5.495946 | 0.402697  | -0.529051 |
| 35 | 6 | 0 | -2.269409 | 3.569935  | -0.551722 |
| 36 | 1 | 0 | -0.230479 | 4.201177  | -0.254159 |
| 37 | 1 | 0 | -4.222109 | 2.674372  | -0.772685 |
| 38 | 1 | 0 | -6.243920 | -1.933916 | -0.150303 |
| 39 | 1 | 0 | -2.605875 | 4.557754  | -0.855339 |

-----

## Grafting, deprotection and subsequent coupling reactions of $N_2^+$ -Ar-COO-Fm at Au electrodes

### Experimental

Experiments with redox probes were performed using polycrystalline Au disk electrodes (1 mm diameter). Before use, the electrodes were polished with 1  $\mu$ m alumina followed by continuous cycling between 0 and 1.5 V at 50  $\text{mV s}^{-1}$  in 0.01 M  $\text{HClO}_4$  to obtain stable Au oxide formation and reduction peaks. Ar-COO-Fm groups were electrografted to Au disk electrodes from a solution of 5 mM  $N_2^+$ -Ar-COO-Fm and 0.1 M TBABF<sub>4</sub> in acetonitrile (ACN) using 5 potential cycles between 0.80 and -0.75 V vs Hg/calomel/ LiCl<sub>(aq)</sub> (1 M) at a scan rate of 50  $\text{mV s}^{-1}$ . The modified electrodes were rinsed with acetone, sonicated in ACN for 5 min, and dried with a stream of  $N_2(\text{g})$ .

Scanning tunnelling microscopy (STM) and atomic force microscopy (AFM) imaging were performed on Au films deposited on mica. Ar-COOH-Fm layers were grafted from a solution of 1 mM  $N_2^+$ -Ar-COO-Fm and 0.1 M TBABF<sub>4</sub> in ACN using 2 potential cycles between 0.6 and -0.2 V vs Hg/calomel/ LiCl<sub>(aq)</sub> (1 M) at a scan rate of 100  $\text{mV s}^{-1}$ . The modified surfaces were rinsed with acetone and ACN, and dried with a stream of  $N_2(\text{g})$ .

The protecting Fm group was cleaved from Ar-COOH-Fm layers by immersing the modified electrode in a stirred solution of 20 % piperidine in DMF for 40 min. Electrodes were rinsed with acetone and  $\text{H}_2\text{O}$  after deprotection. For experiments monitoring the response of redox probes at grafted electrodes, cyclic voltammograms were first obtained using the unmodified electrode in the redox probe solution, the electrode was then rinsed with  $\text{H}_2\text{O}$  (or acetone for the ferrocene redox probe) and dried with  $N_2$  gas between each scan.

After deprotection of the grafted electrodes, attempts were made to couple nitrophenyl (NP) groups to the surface. The modified Au electrodes were heated under reflux in anhydrous  $\text{CH}_2\text{Cl}_2$  (6 mL) with oxalyl chloride (25  $\mu\text{L}$ ) and pyridine (8  $\mu\text{L}$ ) for 1 h under a  $\text{N}_2$  atmosphere. All volatiles were then removed under vacuum followed by the introduction of 4-nitrobenzylamine hydrochloride (NBAHCl) in anhydrous  $\text{CH}_2\text{Cl}_2$  (6 mL) with excess of triethylamine under a  $\text{N}_2$  atmosphere. The reaction was stirred for 5 min in an ice bath and then at room temperature overnight. The electrodes were then washed in clean vigorously stirred  $\text{CH}_2\text{Cl}_2$  for 10 min followed by sonication in ethanol (EtOH) for 2 min; the modified electrodes were dried with a stream of  $\text{N}_2(\text{g})$ . To couple ferrocenyl (Fc) groups to the deprotected modified electrodes, the electrodes were stirred overnight in 5 mL of DMF containing 12  $\mu\text{mol}$  1-ethyl-3-(3-dimethylaminopropyl)carbodiimide hydrochloride (EDC, Chem-Impex International), 25  $\mu\text{mol}$  N,N-diisopropylethylamine (DIPEA, Acros Organics), 12  $\mu\text{mol}$  1-hydroxybenzotriazole hydrate (HOBt) and 10  $\mu\text{mol}$   $\text{FcCH}_2\text{NH}_2$ . The treated electrodes were then washed in stirred in DMF for 10 min.

STM and AFM imaging was undertaken in a ultrahigh vacuum (UHV) chamber with a background pressure below  $7 \times 10^{-10}$  mbar using a variable-temperature AFM/STM (Omicron VT-AFM XA). STM scanning parameters were set to 5 pA for the tunnelling current and 1 - 3V for the tunnelling voltage. All AFM/STM images were obtained using Pt-Ir tips.

## Results

Figure S1 shows cyclic voltammograms for grafting Ar-COO-Fm to the Au electrode. Figure S2 shows cyclic voltammograms of redox probes at Au electrodes before modification, after grafting an Ar-COO-Fm film and after treatment of the grafted electrode in the deprotection solution. After reaction of the deprotected electrodes with NBAHCl and  $\text{FcCH}_2\text{NH}_2$ , the cyclic voltammograms shown in Figures S3 and S4, respectively, were obtained.

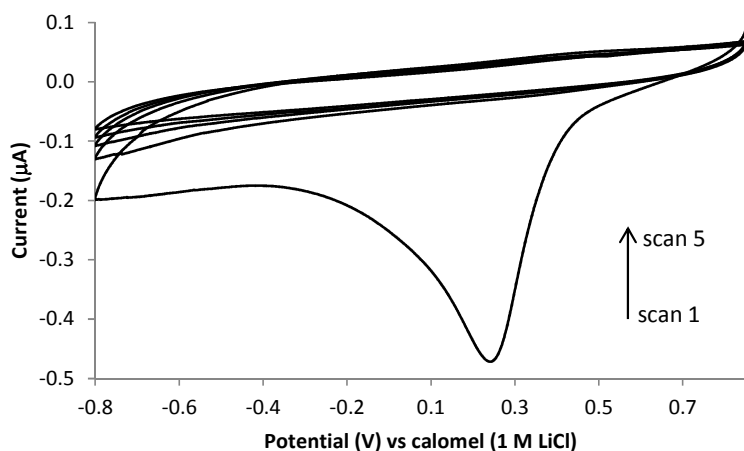

**Figure S1.** Five consecutive scans at a bare Au disk electrode in a solution of 5 mM  $\text{N}_2^+$ -Ar-COO-Fm in 0.1 M TBABF<sub>4</sub>-ACN. Scan rate = 50 mV s<sup>-1</sup>.

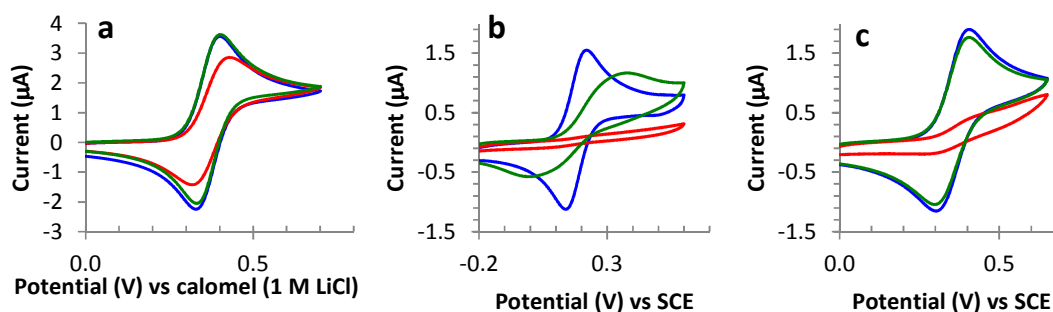

**Figure S2.** Cyclic voltammograms obtained in a solution of: a) 1 mM ferrocene in 0.1 M TBABF<sub>4</sub>-ACN; b) 1 mM ferrocyanide in 0.1 M phosphate buffer (pH 6.9); and c) 1 mM ferrocyanide in 0.1 M H<sub>2</sub>SO<sub>4</sub> at scan rate = 100 mV s<sup>-1</sup>. Bare Au: blue line, Au modified with Ar-COO-Fm before deprotection: red line; and after deprotection in 20% piperidine/DMF for 40 min: green line.

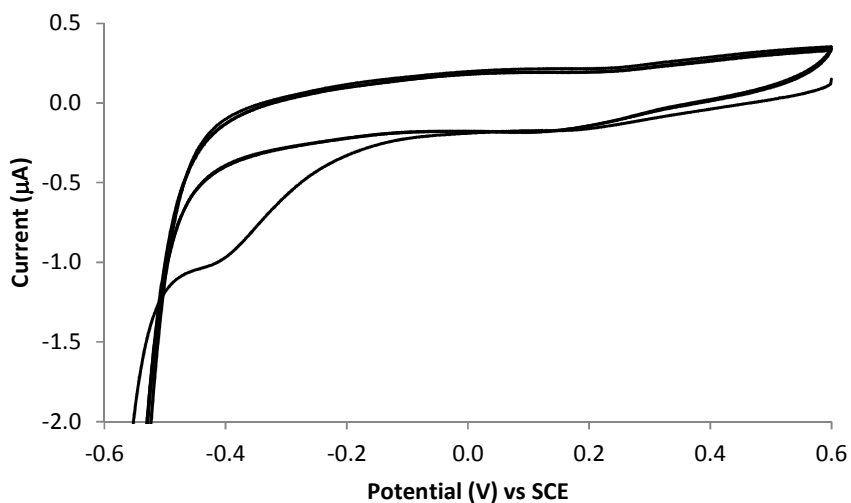

**Figure S3.** Repeat cyclic voltammograms obtained in 0.1 M  $\text{H}_2\text{SO}_4$  at scan rate =  $100 \text{ mV s}^{-1}$  of a Au disk electrode modified with an Ar-COO-Fm layer, deprotected and reacted with NBAHCl.

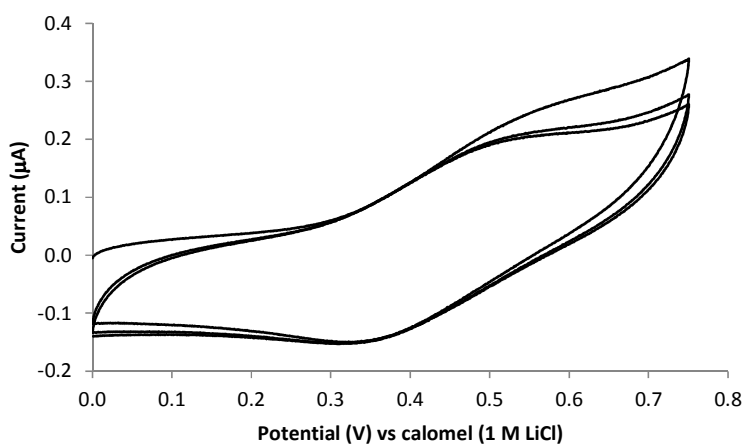

**Figure S4.** Repeat cyclic voltammograms obtained in 0.1 M  $\text{LiClO}_4\text{-EtOH}$  at scan rate =  $200 \text{ mV s}^{-1}$  of a Au disk electrode modified with an Ar-COO-Fm layer, deprotected and reacted with  $\text{FcCH}_2\text{NH}_2$ .

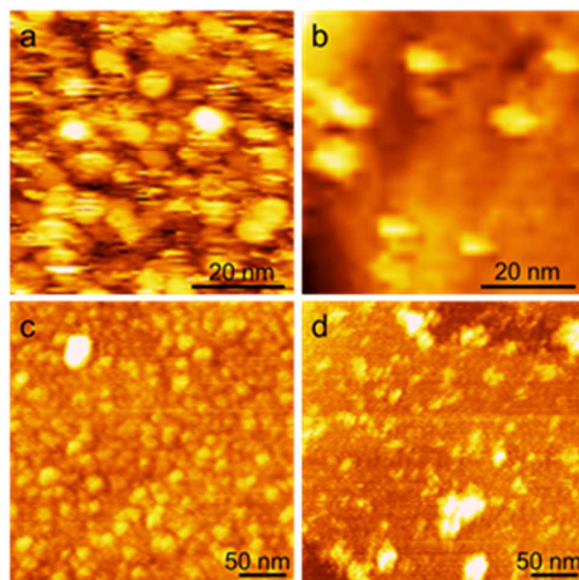

**Figure S5.** STM a), b) and AFM c),d) images of a Au film electrode modified with an Ar-COO-Fm layer before a), c) and after b), d) deprotection in piperidine solution.

## Discussion

The cyclic voltammograms of Figures S1 are typical of those obtained for grafting from diazonium salt solution and are consistent with the formation of a surface film of Ar-COO-Fm, as shown by the STM and AFM images of Figure S5 a) and c). Cyclic voltammograms of redox probes at the Ar-COO-Fm modified surfaces (Figure S2) show that the response of ferricyanide is significantly blocked at the modified surfaces and that the response of ferrocene is partially blocked compared to that at an unmodified Au surface. After treatment of the modified electrodes in the deprotection solution, the responses of ferrocene, and ferricyanide in 0.1 M H<sub>2</sub>SO<sub>4</sub>, closely match the responses at unmodified electrodes. In contrast, the cyclic voltammogram of ferricyanide in pH 6.9 solution exhibits slow kinetics indicating the presence of a partially blocking surface layer. The contrasting behaviour of ferricyanide at the deprotected surface at pH 6.9 and in 0.1 M H<sub>2</sub>SO<sub>4</sub> suggest that the surface is modified with a layer with acid-base properties. This is consistent with the presence of an



Ar-COOH layer which is deprotonated at pH 6.9 (and therefore repels the anionic ferrocyanide redox probe) and protonated in 0.1 M H<sub>2</sub>SO<sub>4</sub>.

Although the redox probe experiments described above suggest that the deprotection step at Au proceeded analogously to that at glassy carbon (GC), to give an Ar-COOH monolayer, further investigations demonstrated that this is not the case. Attempts to couple redox active NP and Fc groups to the (supposed) Ar-COOH monolayer resulted in only very small amounts of immobilized species (Figures S3 and S4). Both the oxalyl chloride coupling method used successfully at GC and a milder method using EDC and HOBt proved unsuccessful. Consideration of the AFM and STM images of Au surfaces after treatment in the deprotection solution strongly suggest that the surfaces bear only scattered adsorbates which may be largely attributed to adventitious contaminants. We tentatively suggest that the deprotection conditions largely strip the grafted layer from the surface through interactions between piperidine and Au surface atoms.
